# Supplementary material for: Imaging Neuronal Activity in the Optic Tectum of Late Stage Larval Zebrafish
Source: J Dev Biol. 2018 Mar 9;6(1):6. doi: 10.3390/jdb6010006 (PMC5875565; doi:10.3390/jdb6010006)

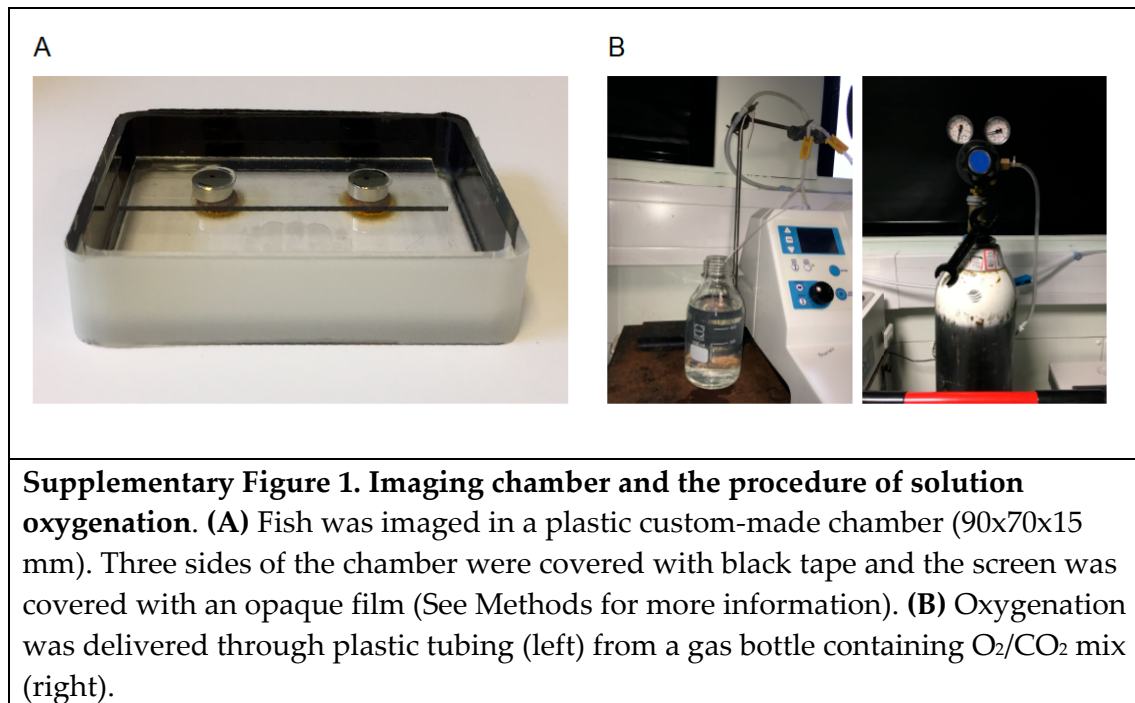

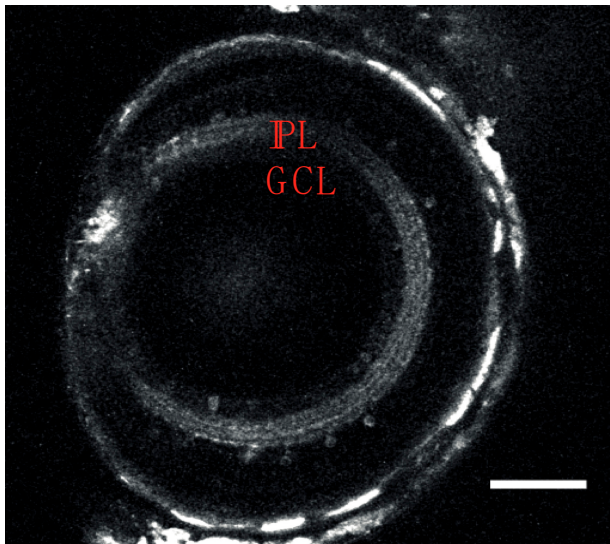

**Supplementary Figure 2. NBT:GCaMP3 transgenic line; expression in the retina (right, 10 dpf).** In the eye, GCaMP3 is expressed in the inner plexiform layer (depicted as IPL) and in a small number of cells ( $2.75 \pm 0.9$  per field of view,  $n = 10$  fields of view) in the ganglion cell layer (depicted as GCL). For presentation purposes, images were filtered using a Gaussian filter ( $\sigma = 1$ ).

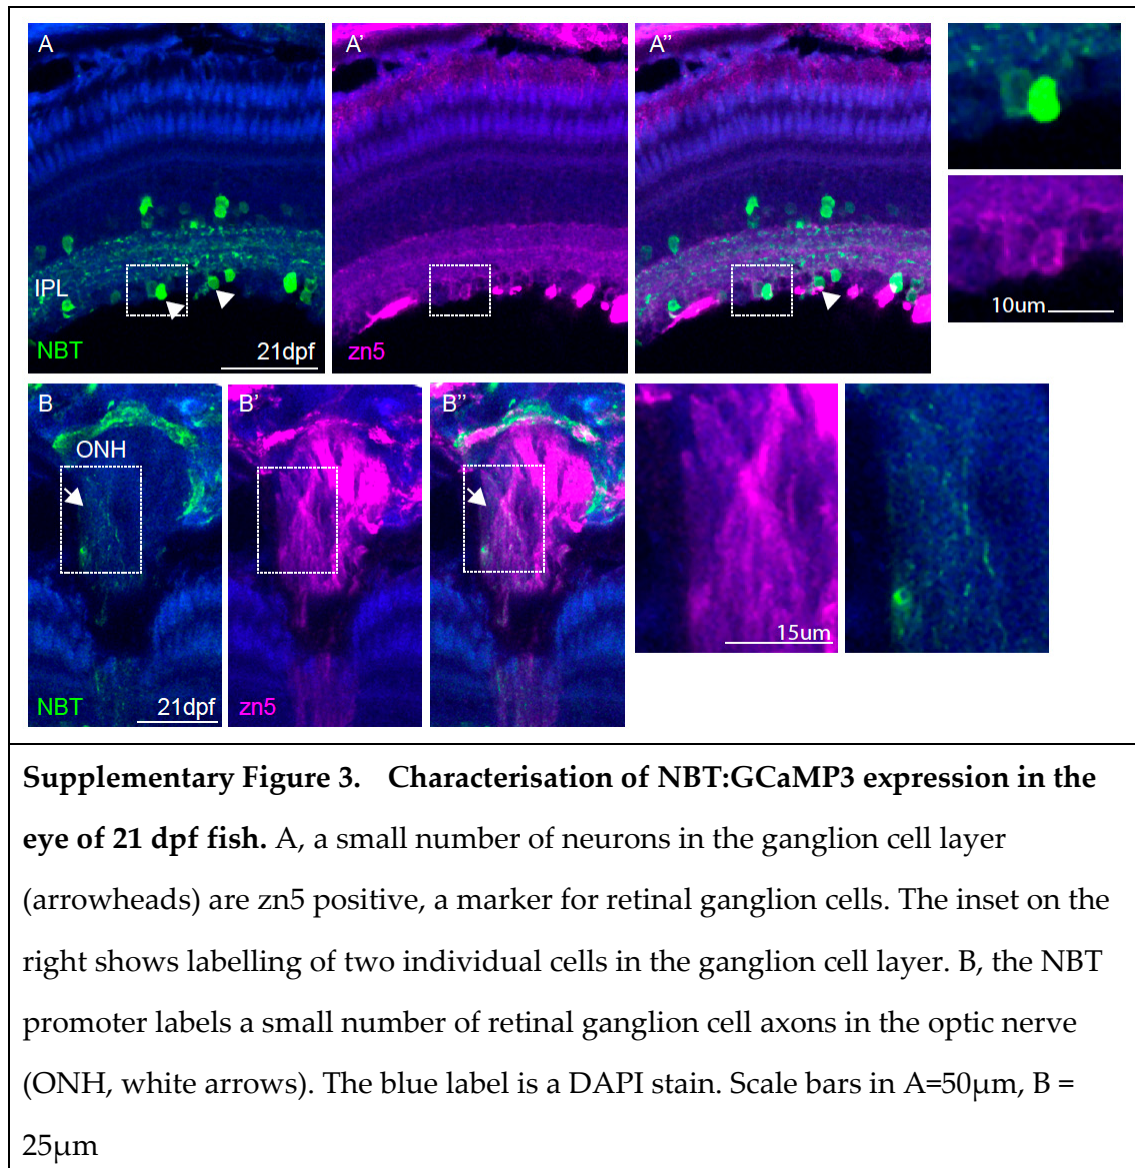

Supplement: Supplementary file 1 [file jdb-06-00006-s001.pdf]
